# Supplementary material for: Regulation of MicroRNA-497-Targeting AKT2 Influences Tumor Growth and Chemoresistance to Cisplatin in Lung Cancer
Source: PubMed Central journal article supplement (PMC7505950; doi:10.3389/fcell.2020.00840), 2020-09-08

## Supplementary data

**Sup Figure 1. MiR-497 overexpression suppresses cell proliferation, colony formation and AKT2 expression of H1975 lung cancer cell.** (A) Overexpression of miR-497 decreased cell growth activity. (B) Colony formation was conducted in indicated cells, while the activity of colony formation were reduced in miR-497 group compared with miR-NC. (C) AKT2 protein levels was suppressed by miR-497. Data were presented by mean±SD. of 3 replicates. \* indicated  $P<0.05$ . \*\* indicated  $P<0.01$ .

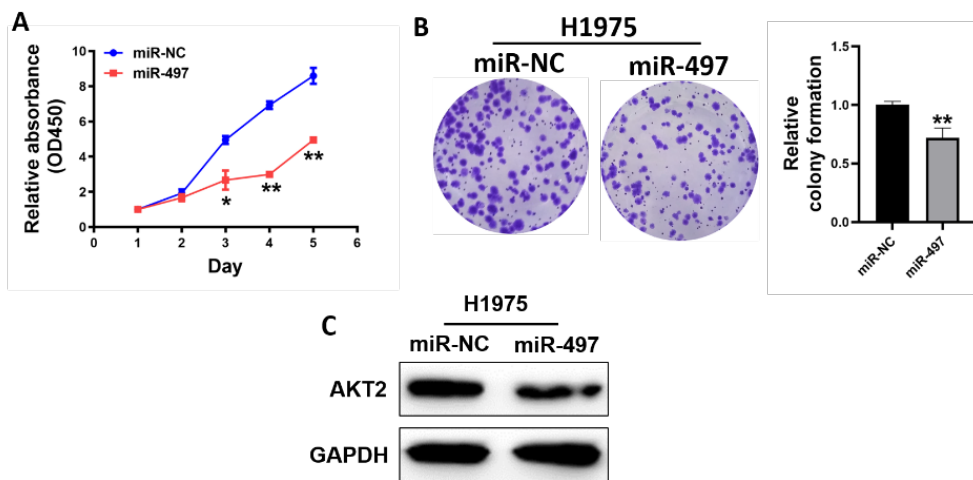

**Sup Figure 2. Inhibition of miR-497 in H1299 induced cell proliferation and colony formation activity.** (A) Inhibition of miR-497 increased cell growth activity. (B) Colony formation was conducted, and the activity of colony formation were induced in miR-497-inhibitor group. Data were presented by mean±SD. of 3 replicates. \* indicated  $P<0.05$ . \*\* indicated  $P<0.01$ .

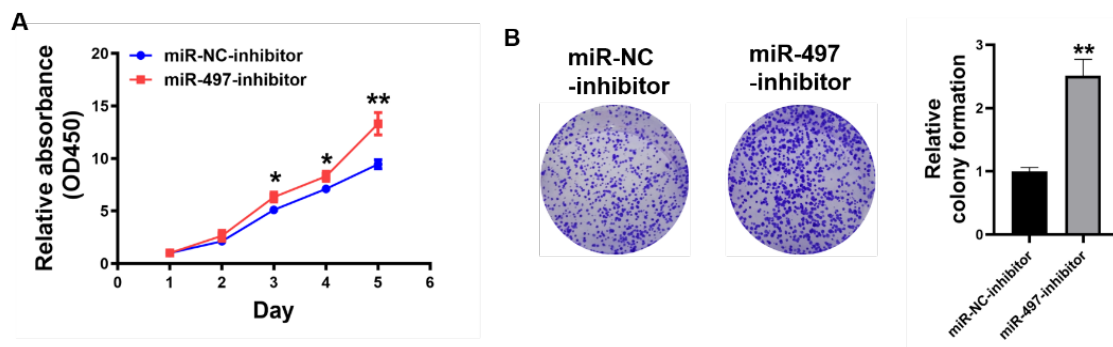

Supplement: Image_1.pdf [file Image_1.pdf]
